# Supplementary material
Source: PubMed Central journal article supplement (PMC3754695)
Supplement: AEM.01281-13_zam999104588so1.pdf [file AEM.01281-13_zam999104588so1.pdf]

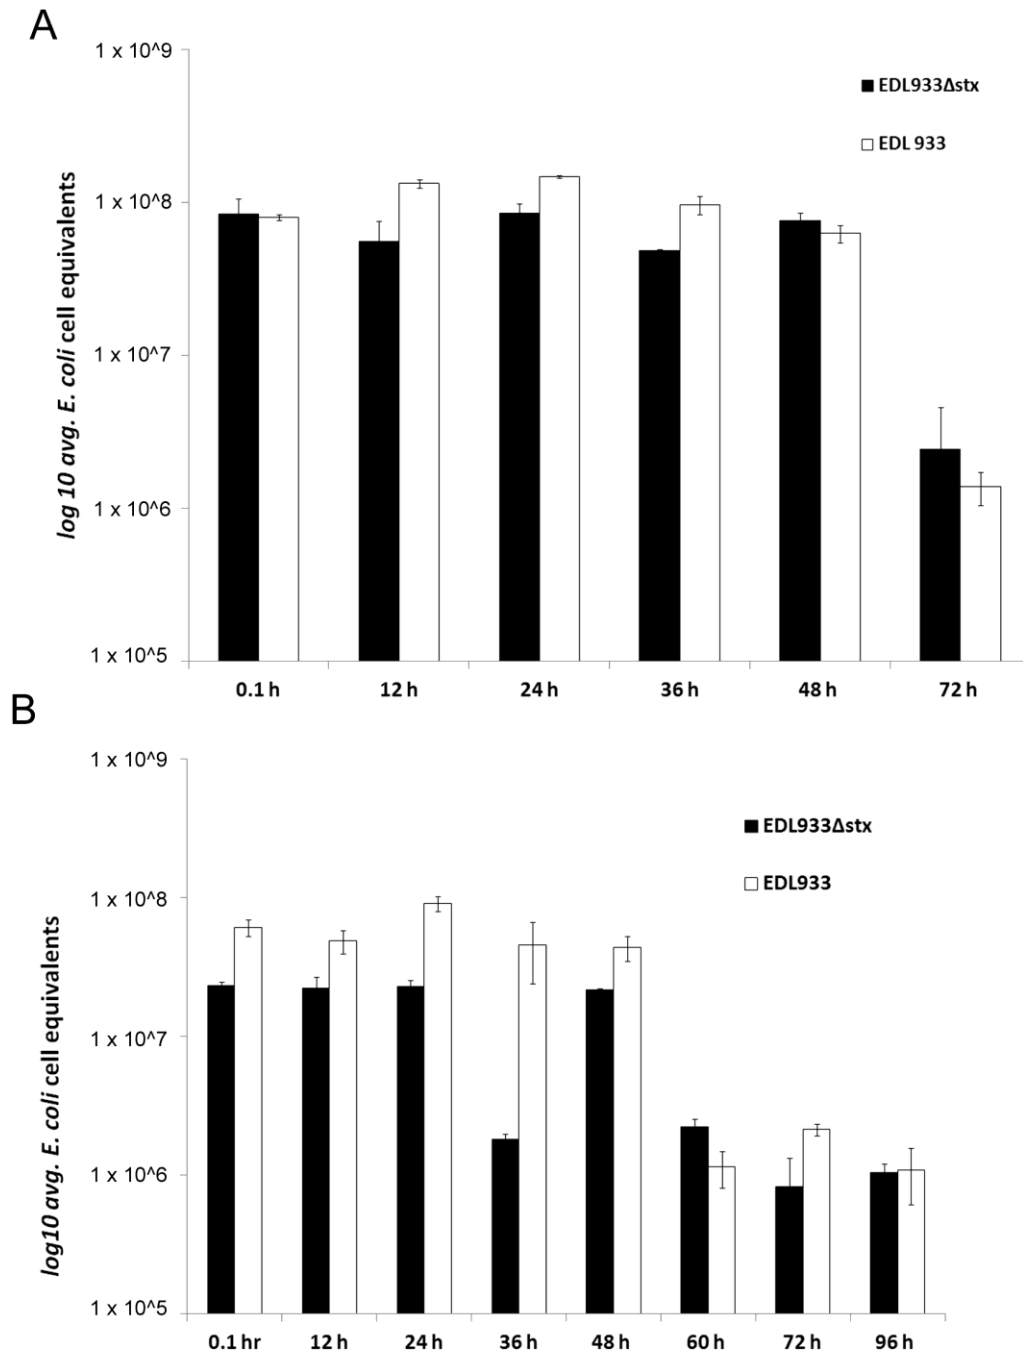

**FIG. S1.** STEC strains were concentrated and added to 50 mL of recreational water obtained from Mill Creek (A) on a different day from what is depicted in Fig. 1 or Presque Isle State Park (B). At the indicated time points, 2 mL of the water sample was used to determine *E. coli* cell equivalents by qPCR. Error bars represent standard error of average values of samples performed in duplicate for each STEC strain.

Table S1. Production of Stx bacteriophages and Stx mRNA by STEC strains

| Bacterial            | Phage equivalents<br>(x 10 <sup>6</sup> ± SE)* | Copies of <i>stx2</i> mRNA/ <i>uid</i> mRNA |
|----------------------|------------------------------------------------|---------------------------------------------|
| EDL933 non- induced  | 7.64 ± 1.92                                    | 0.012 ± 0.005                               |
| EDL933 induced       | 25.10 ± 13.2                                   | 4137.37 ± 285.95                            |
| B2F1 non-induced     | 5.05 ± 1.23                                    | 0.682 ± 0.25                                |
| B2F1 induced         | 3.21 ± 0.97                                    | 24.86 ± 35.9                                |
| LB226692 non-induced | 1.86 ± 0.61                                    | 0.017 ± 0.008                               |
| LB226692 induced     | 21.80 ± 9.9                                    | 2858.93 ± 881.53                            |

\* Values represent average and standard error from three separate experiments using induction and quantification conditions described in materials and methods.

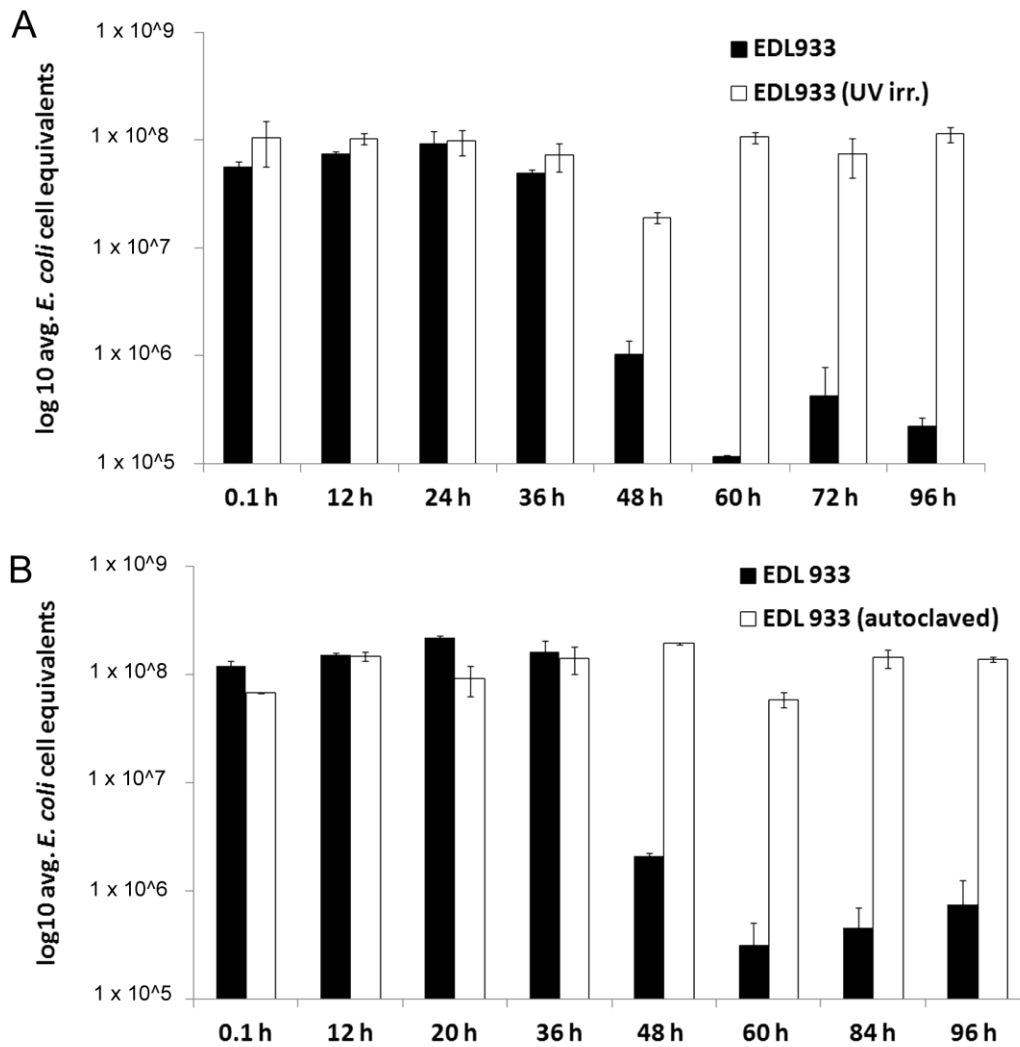

**FIG. S2.** STEC strains were concentrated and added to 50 mL of recreational water obtained from Mill Creek which was not treated or treated by sustained UV irradiation (A) or autoclaving for 15 min. prior to EDL933 addition (B) to inactivate microbes. At the indicated time points, 2 mL of the water sample was used to determine *E. coli* cell equivalents by qPCR. Error bars represent standard error of average values of samples performed in duplicate for each STEC strain.
